# Supplementary material
Source: PubMed Central journal article supplement (PMC7210343)
Supplement: 11606_2020_5699_MOESM1_ESM.pdf [file 11606_2020_5699_MOESM1_ESM.pdf]

1 July 2012 – 30 June 2015  
2<sup>nd</sup> follow up time period (F2)

1 July 2009 – 30 June 2012  
1<sup>st</sup> follow up time period (F1)

1 July 2005 – 30 June 2009  
Baseline time period

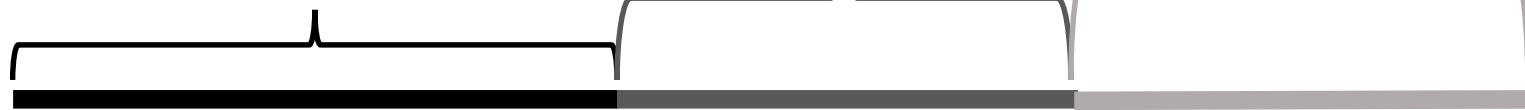

Data  
used

Socio-demographics at recruitment  
45 and Up Study self report health and behaviours  
GP contact  
Specialist physician services  
Medicare-funded chronic disease management and mental health-related services.  
Socio-economic status and accessibility to services  
Rx Risk 1 & 5 (as at entry to time period)  
MACCS 1 & 5 (as at entry to time period)  
Hospital admissions

GP contact  
Specialist physician services  
Medicare-funded chronic disease management and mental health-related services.  
Socio-economic status and accessibility to services  
Rx Risk 1 & 5 (as at entry to time period)  
MACCS 1 & 5 (as at entry to time period)  
Hospital admissions

GP contact  
Specialist physician services  
Medicare-funded chronic disease management and mental health-related services.  
Socio-economic status and accessibility to services  
Hospital admissions  
Rx Risk 1 & 5 (as at entry to time period)  
MACCS 1 & 5 (as at entry to time period)  
Date of death (if applicable)  
Days spent out of hospital.
